# Supplementary material for: Discrimination of Lycium chinense and L. barbarum Based on Metabolite Analysis and Hepatoprotective Activity
Source: PubMed Central journal article supplement (PMC7764731; doi:10.3390/molecules25245835), 2020-12-10

## Supporting Information for

# Discrimination of *Lycium chinense* and *L. barbarum* Based on Metabolite Analysis and Hepatoprotective Activity

Min-Ji Ryu<sup>1,#</sup>, Minjeong Kim<sup>2,#</sup>, Moongi Ji<sup>3,#</sup>, Chaeyoung Lee<sup>2</sup>, Inho Yang<sup>4</sup>, Seong-Bin Hong<sup>5</sup>,  
Jungwook Chin<sup>6</sup>, Eun Kyoung Seo<sup>2</sup>, Man-Jeong Paik<sup>3,\*</sup>, Kyung-Min Lim<sup>2,\*</sup> and Sang-Jip Nam<sup>1,\*</sup>

<sup>1</sup> Department of Chemistry and Nanoscience, Ewha Womans University, Seoul 03760, Korea;  
ryumj624@naver.com (M.-J.R.) sjnam@ewha.ac.kr (S.-J.N.)

<sup>2</sup> College of Pharmacy, Ewha Womans University, Seoul 03760, Korea; nabe37@naver.com (M.K.)  
chaeyoung510@gmail.com (C.L.) yuny@ewha.ac.kr (E.K.S.) kmlim@ewha.ac.kr (K.-M.L.)

<sup>3</sup> College of Pharmacy, Suncheon National University, Suncheon 57922, Korea; wlansrl@naver.com (M.J.)  
paik815@snu.ac.kr (M.-J.P.)

<sup>4</sup> Department of Convergence Study on the Ocean Science and Technology, Korea Maritime and Ocean  
University, Busan 4912, Korea; ihyang@kmou.ac.kr

<sup>5</sup> Biomix Co., Ltd. 142, Ilsan-ro, Ilsandong-gu, Goyang-si, Gyeonggi-do 10442, Korea; au4030@hanmail.net

<sup>6</sup> New Drug Development Center, Daegu Gyeongbuk Medical Innovation Foundation, Daegu 41061, Korea;  
jwchin@dgmif.re.kr

<sup>#</sup> These authors contributed equally to this work.

<sup>\*</sup> Correspondence: paik815@snu.ac.kr (M.-J.P.), kmlim@ewha.ac.kr (K.-M.L.), sjnam@ewha.ac.kr (S.-J.N.)

## Table of Contents

**Figure S1.**  $^1\text{H}$  NMR spectrum of 4-[formyl-5-(hydroxymethyl)-1*H*-pyrrol-1-yl]butanoic acid (**1**) in  $\text{CD}_3\text{OD}-d_4$

**Figure S2.**  $^{13}\text{C}$  NMR spectrum of 4-[formyl-5-(hydroxymethyl)-1*H*-pyrrol-1-yl]butanoic acid (**1**) in  $\text{CD}_3\text{OD}-d_4$

**Figure S3.**  $^1\text{H}$  NMR spectrum of *p*-coumaric acid (**2**) in  $\text{CD}_3\text{OD}-d_4$

**Figure S4.**  $^{13}\text{C}$  NMR spectrum of *p*-coumaric acid (**2**) in  $\text{CD}_3\text{OD}-d_4$

**Figure S5.** Commercially available Lycii Fructus of *L.chinense* and *L. barbarum*. (12 samples of two *Lycium* spp.)

**Figure S6.** LC Chromatogram of Lycii Fructus of *L.chinense* and *L. barbarum*. Numbers corresponding sample number of Figure S5. Each peaks were identified as 4-(2-formyl-5-(hydroxymethyl)-1*H*-pyrrol-1-yl)butanoic acid (**1**) and *p*-coumaric acid (**2**).

**Figure S1.**  $^1\text{H}$  NMR spectrum of 4-[formyl-5-(hydroxymethyl)-1*H*-pyrrol-1-yl]butanoic acid (**1**) in  $\text{CD}_3\text{OD-}d_4$ .

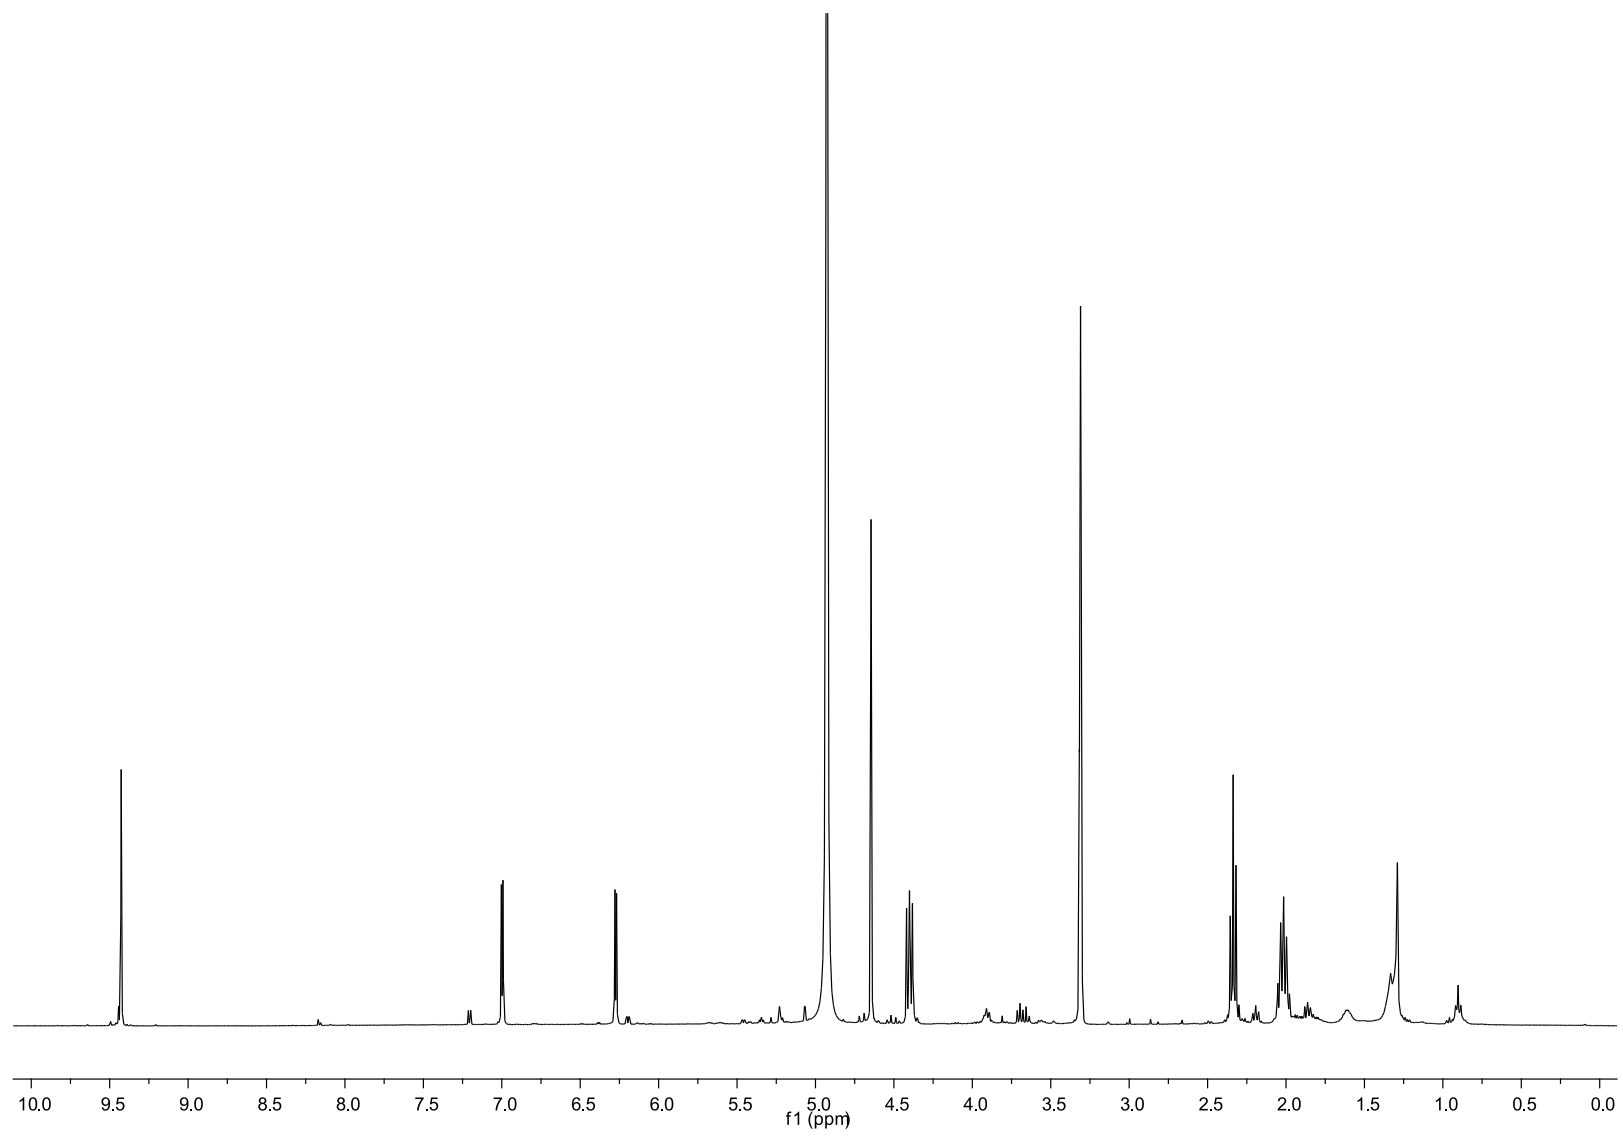

**Figure S2.**  $^{13}\text{C}$  NMR spectrum of 4-[formyl-5-(hydroxymethyl)-1*H*-pyrrol-1-yl]butanoic acid (**1**) in  $\text{CD}_3\text{OD-}d_4$

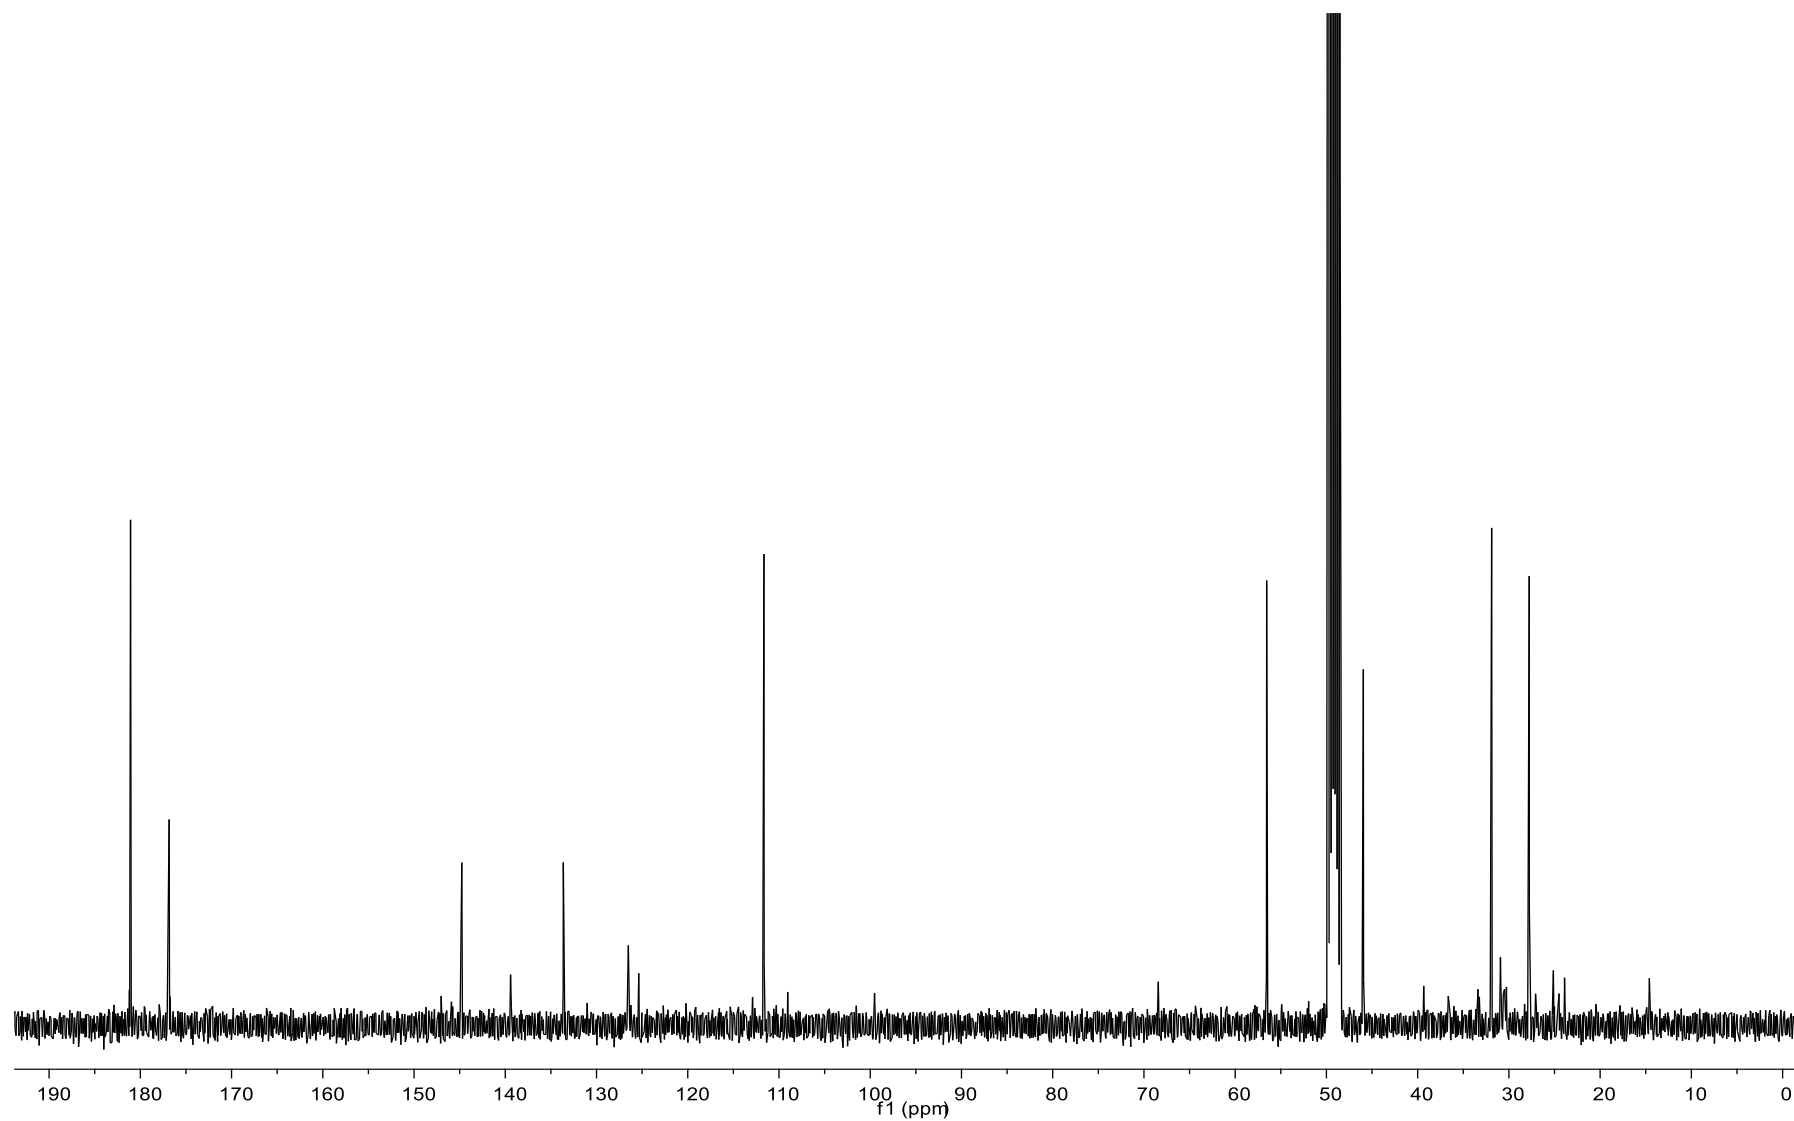

**Figure S3.**  $^1\text{H}$  NMR spectrum of *p*-coumaric acid (**2**) in  $\text{CD}_3\text{OD}-d_4$

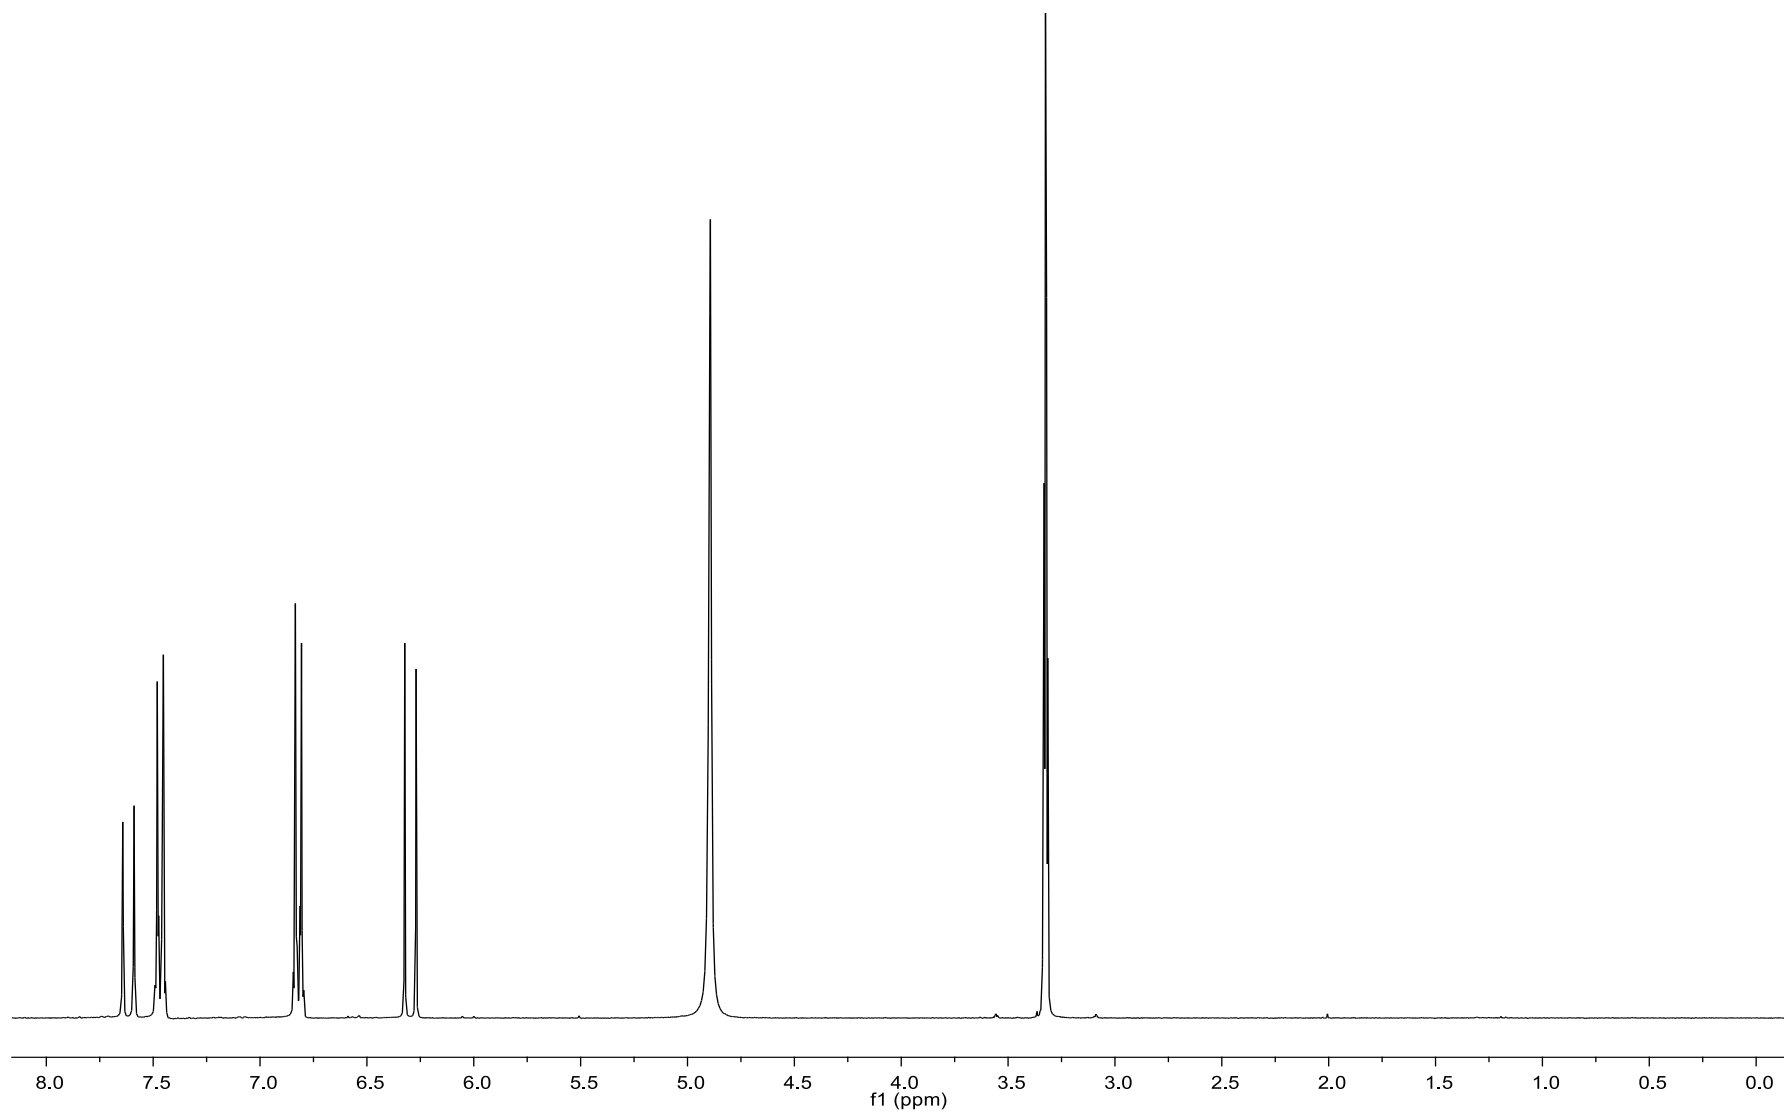

**Figure S4.**  $^{13}\text{C}$  NMR spectrum of *p*-coumaric acid (**2**) in  $\text{CD}_3\text{OD}-d_4$

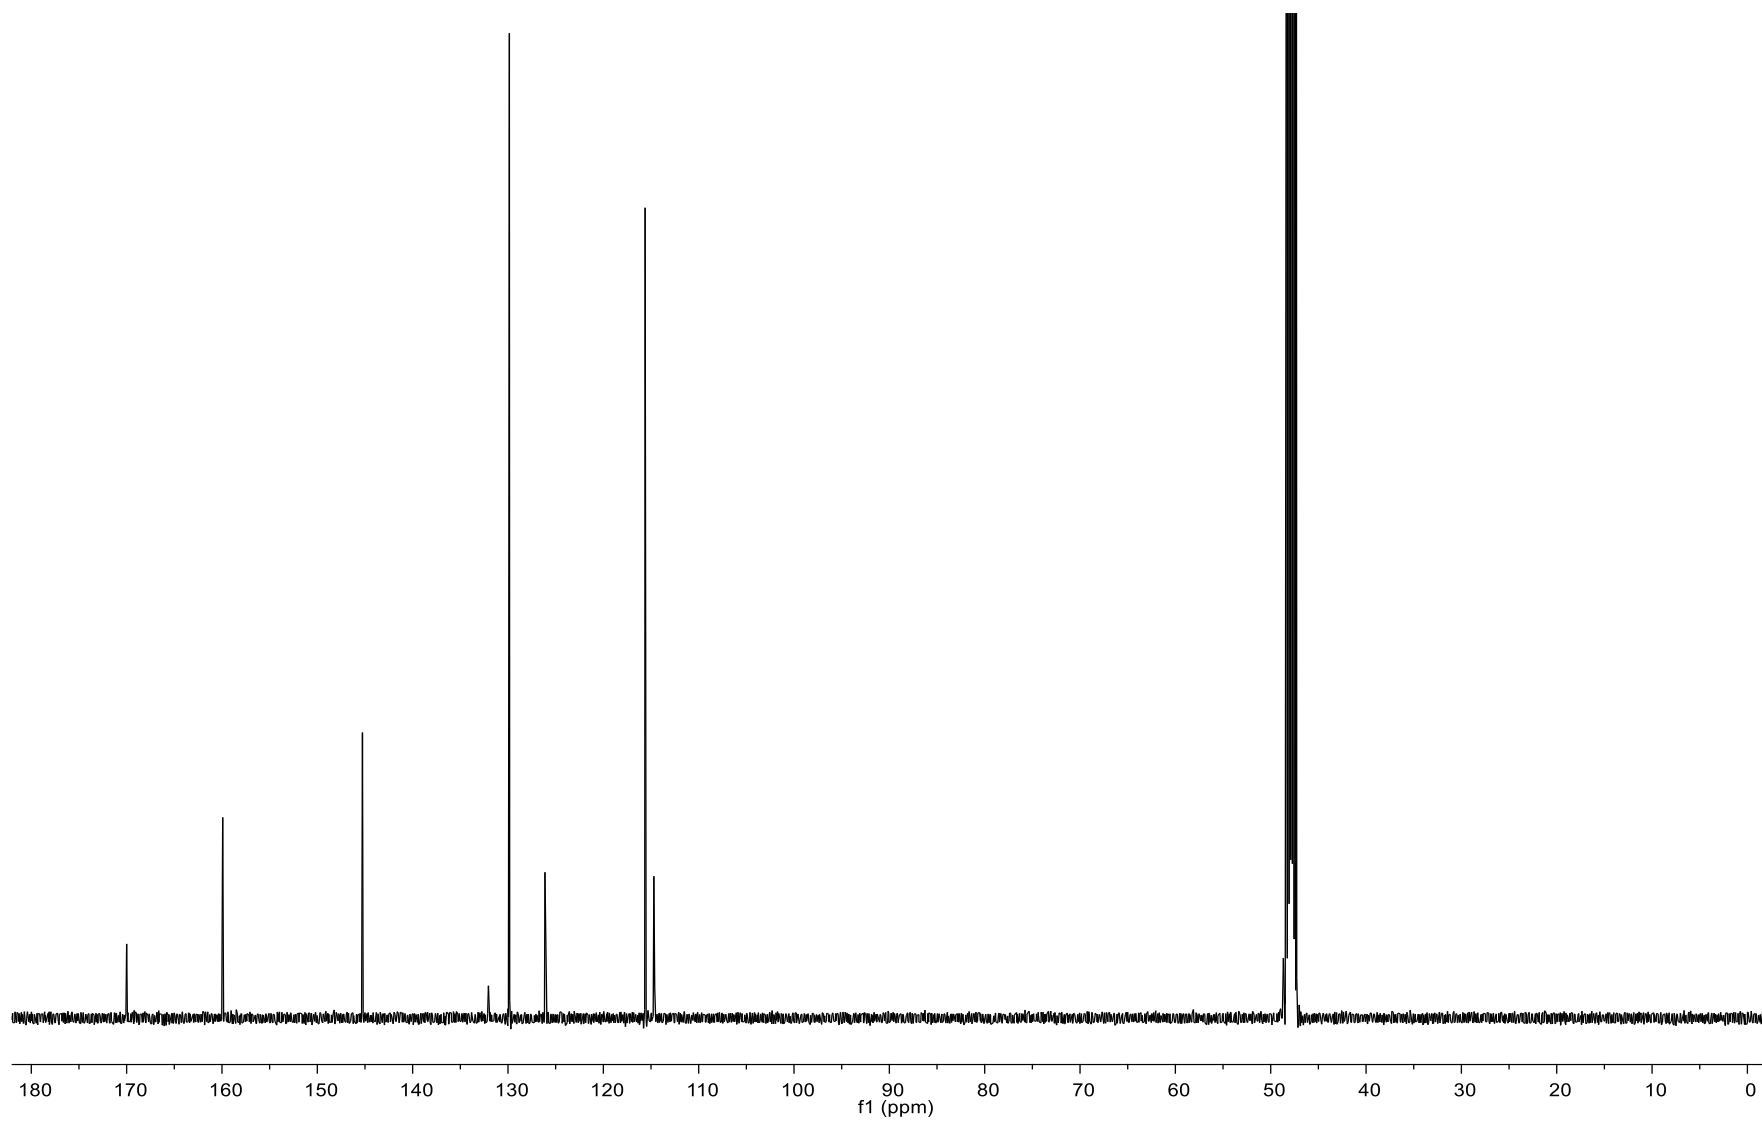

Figure S5. Commercially available Lycii Fructus of *L.chinense* and *L. barbarum*. (12 samples of two *Lycium* spp.)

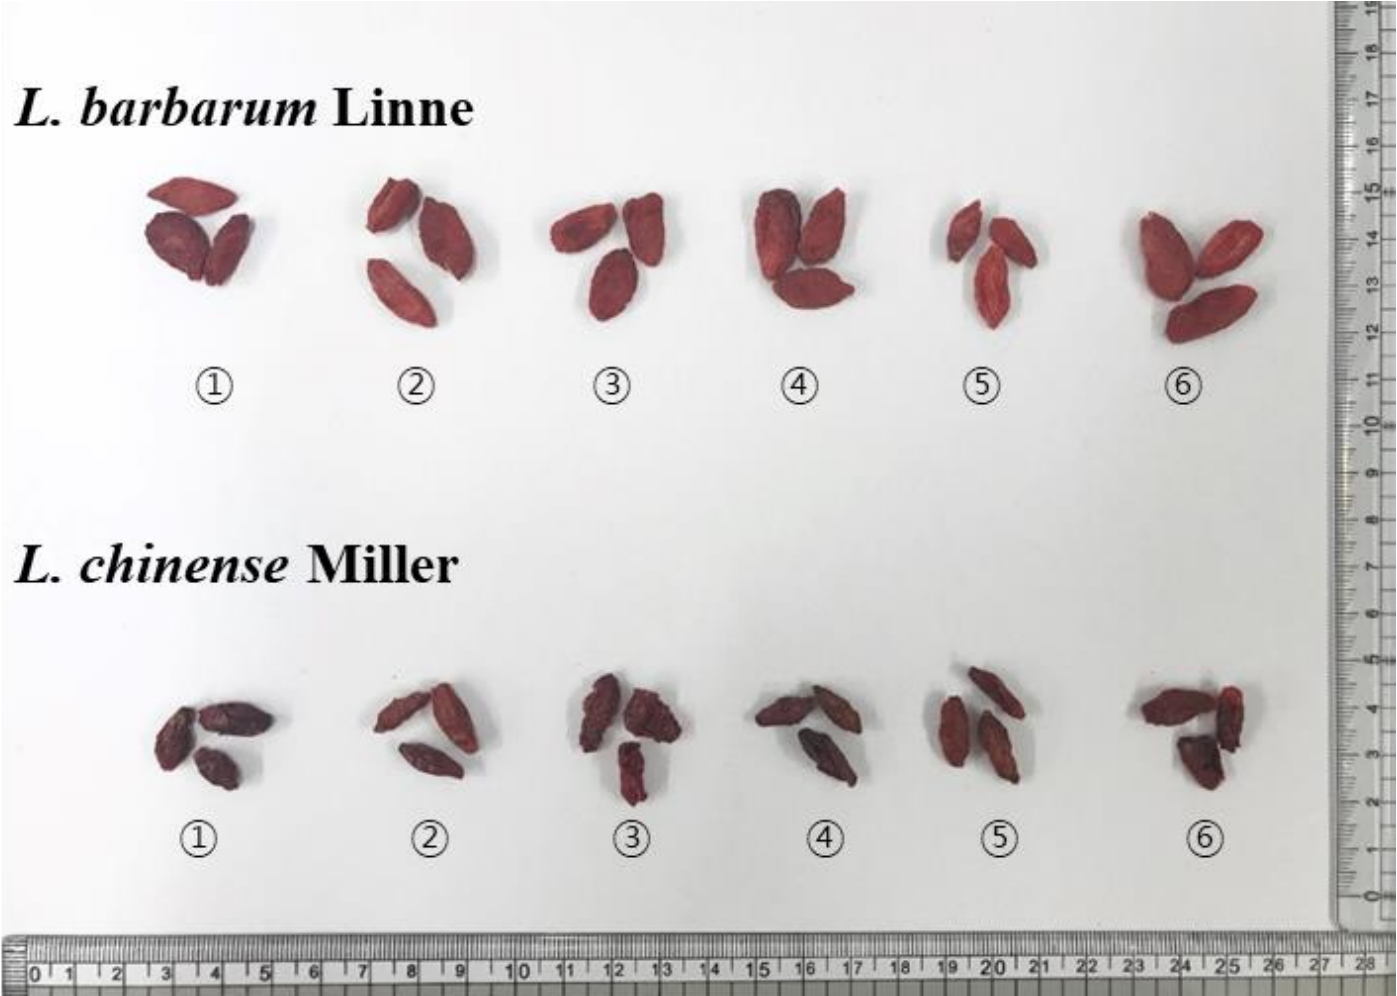





**Figure S6.** LC Chromatogram of Lycii Fructus of *L.chinense* and *L. barbarum*. Numbers corresponding sample number of Figure S5. Each peaks were identified as 4-(2-formyl-5-(hydroxymethyl)-1*H*-pyrrol-1-yl)butanoic acid (**1**) and *p*-coumaric acid (**2**).

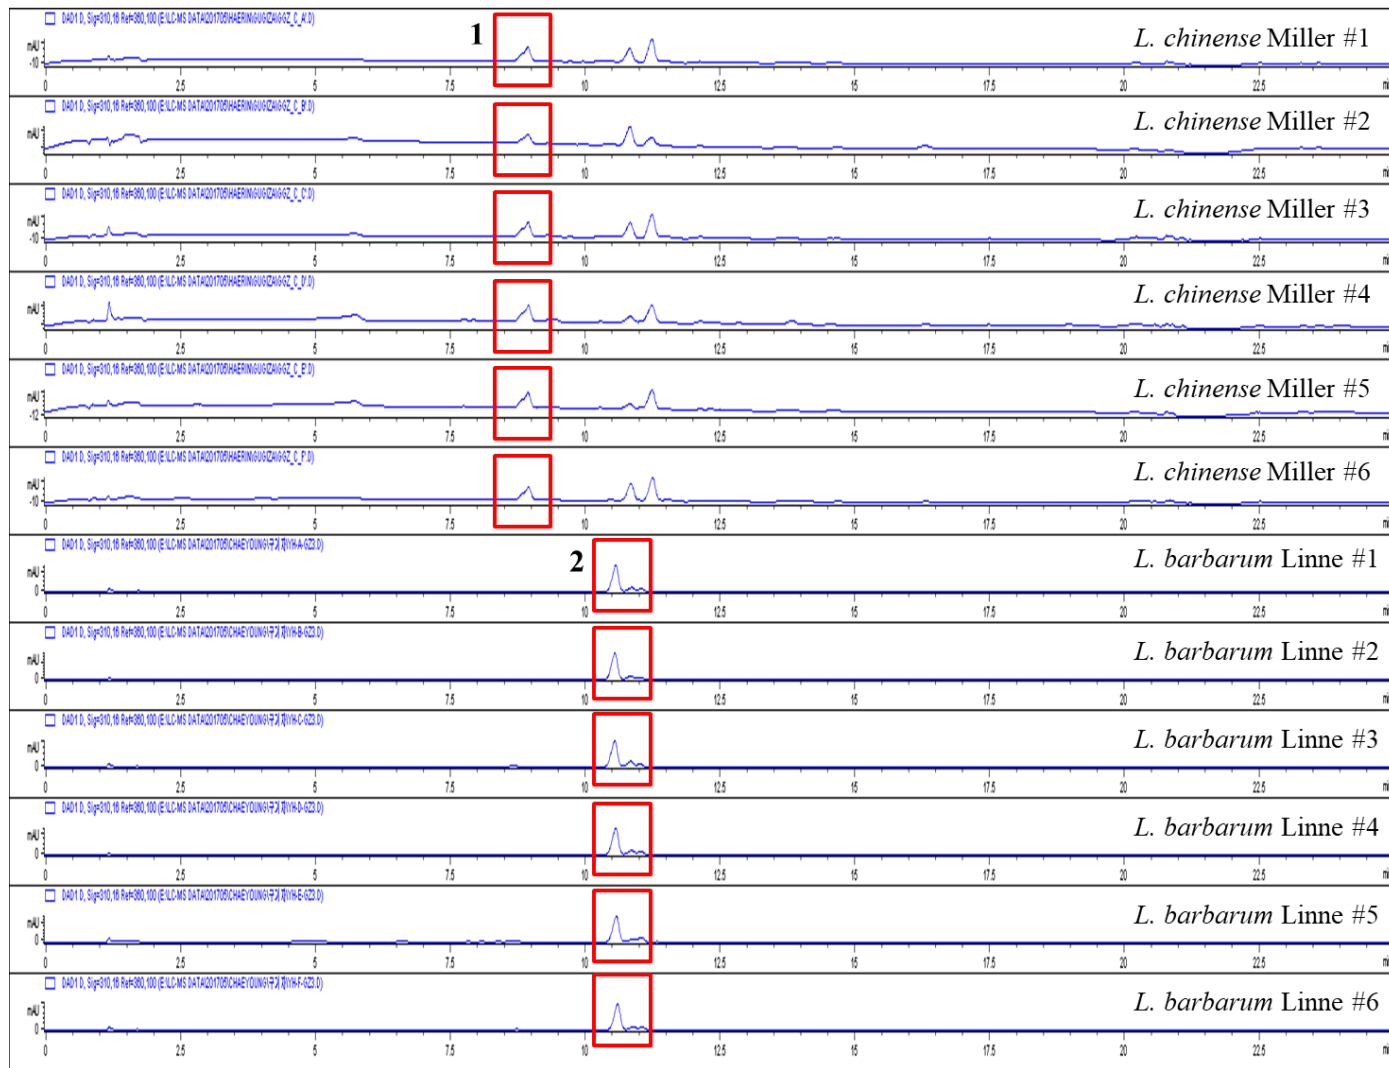

Supplement: molecules-25-05835-s001.pdf [file molecules-25-05835-s001.pdf]
